FALL 2019 | VOLUME 31 | NUMBER 4

The Journal of  
**Neuropsychiatry**  
and Clinical Neurosciences

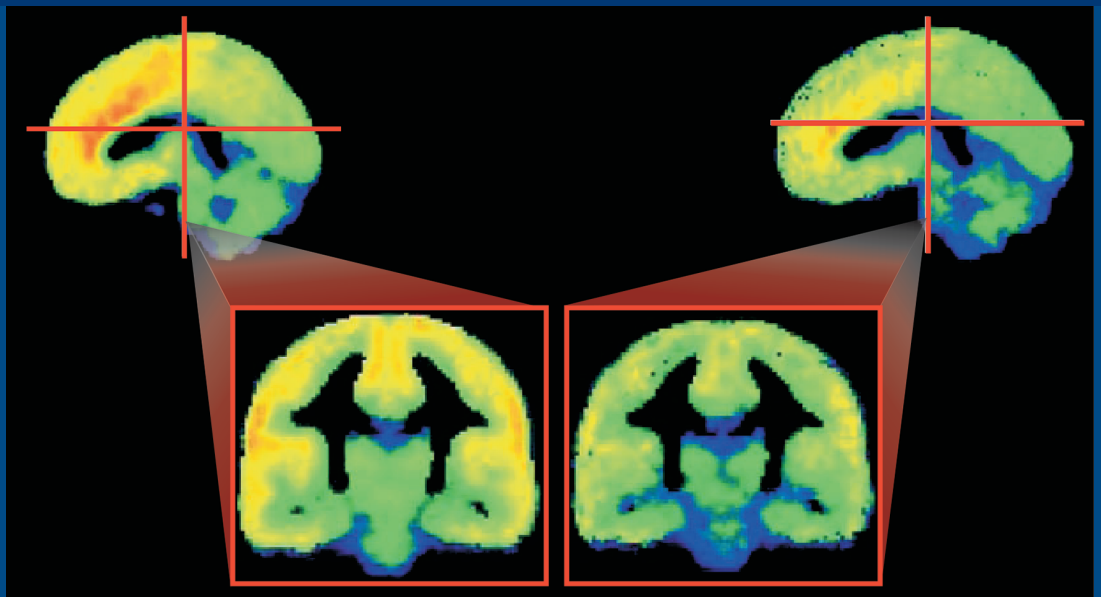

Neuroprotective Benefits of Antidepressants in Multiple Sclerosis:  
Are We Missing the Mark?

Association of COMT Val<sup>158</sup>Met Polymorphism With Delirium  
Risk and Outcomes After Traumatic Brain Injury

Treating Alcohol Use Disorder in U.S. Veterans:  
The Role of Traumatic Brain Injury

Ages at Onset of Anxiety and Depressive Disorders  
in Parkinson's Disease

Management of Insomnia and Anxiety in Myasthenia Gravis

Official Journal of the American Neuropsychiatric Association  
[neuro.psychiatryonline.org](http://neuro.psychiatryonline.org)
