# Evaluate Attention Disorders and Neurological Functioning Across the Lifespan.

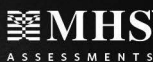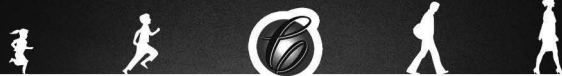

**CONNERS K-CPT 2**  
Conners Kiddie Continuous Performance Test 2nd Edition

**CONNERS CPT 3**  
Conners Continuous Performance Test 3rd Edition

**CONNERS CATA**  
Conners Continuous Auditory Test of Attention

For Ages 4 to 7

For Ages 8+

For Ages 8+

7.5 minutes to complete and uses pictures of objects familiar to young children.  
MHS.com/KCPT2

A task-oriented computerized assessment of attention-related problems.  
MHS.com/CPT3

Assesses auditory processing and attention-related problems.  
MHS.com/CATA

Now available! Develop a comprehensive evaluation using the gold standard in CPT assessment with the Conners CPT 3™, an auditory test of attention with the Conners CATA®, and the Conners K-CPT 2™ now with an expanded age range.

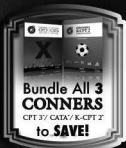

- Easy interpretation with new reports offering clear visuals & summaries.
- Trusted results with the most representative CPT normative samples collected.
- New scores were developed to help pinpoint the exact nature of the child or adult's attention problems.

**Earn CE/CPD Credits with the Conners CPT 3/CATA/K-CPT 2.**  
It is easy to earn CE/CPD credits quickly and online. Just study the manual or watch the online workshop, pass the online questionnaire, and a certificate is created for you.  
Learn more at [MHS.com/Learn](http://MHS.com/Learn)

**MHS** Multi-Health Systems Inc.  
USA Tel: 1-800-486-3003 / CAN Tel: 1-800-268-6201  
mhs.com • customer@mhsmhs.com

## Statement of Ownership, Management, and Circulation PS Form 3526 (All Periodicals Publications Except Requester Publications)

|                                                                                                                                                                                                                                                                                                                                                                                                                                                                                                                                                                         |                                                                                      |                                           |                                                             |
|-------------------------------------------------------------------------------------------------------------------------------------------------------------------------------------------------------------------------------------------------------------------------------------------------------------------------------------------------------------------------------------------------------------------------------------------------------------------------------------------------------------------------------------------------------------------------|--------------------------------------------------------------------------------------|-------------------------------------------|-------------------------------------------------------------|
| 1. Publication Title<br>AMERICAN PSYCHIATRIC ASSOCIATION/JOURNAL OF NEUROPSYCHIATRY AND CLINICAL NEUROSCIENCES (THE)                                                                                                                                                                                                                                                                                                                                                                                                                                                    | 2. Publication Number<br>4241                                                        | ISSN<br>8950172                           | 3. Filing Date<br>09/20/2019                                |
| 4. Issue Frequency<br>QUARTERLY                                                                                                                                                                                                                                                                                                                                                                                                                                                                                                                                         | 5. Number of Issues Published Annually<br>4                                          | 6. Annual Subscription Price<br>\$ 296.00 |                                                             |
| 7. Complete Mailing Address of Known Office of Publication<br>800 Maine Ave S.W., Suite 900<br>Washington, DC 20024-2812                                                                                                                                                                                                                                                                                                                                                                                                                                                |                                                                                      |                                           | Contact Person<br>BRIAN COLE<br>Telephone<br>(202) 459-9750 |
| 8. Complete Mailing Address of Headquarters or General Business Office of Publisher<br>800 Maine Ave S.W., Suite 900<br>Washington, DC 20024-2812                                                                                                                                                                                                                                                                                                                                                                                                                       |                                                                                      |                                           |                                                             |
| 9. Full Names and Complete Mailing Addresses of Publisher, Editor, and Managing Editor                                                                                                                                                                                                                                                                                                                                                                                                                                                                                  |                                                                                      |                                           |                                                             |
| Publisher (Name and complete mailing address)<br>John McDuffie<br>800 Maine Ave S.W., Suite 900<br>Washington, DC 20024-2812                                                                                                                                                                                                                                                                                                                                                                                                                                            |                                                                                      |                                           |                                                             |
| Editor (Name and complete mailing address)<br>David B. Arciniegas, M.D.<br>800 Maine Ave S.W., Suite 900<br>Washington, DC 20024-2812                                                                                                                                                                                                                                                                                                                                                                                                                                   |                                                                                      |                                           |                                                             |
| Managing Editor (Name and complete mailing address)<br>Derrina S. Jackson<br>800 Maine Ave S.W., Suite 900<br>Washington, DC 20024-2812                                                                                                                                                                                                                                                                                                                                                                                                                                 |                                                                                      |                                           |                                                             |
| 10. Owner (Do not leave blank. If the publication is owned by a corporation, give the name and address of the corporation immediately followed by the names and addresses of all stockholders owning or holding 1 percent or more of the total amount of stock. If not owned by a corporation, give names and addresses of the individual owners. If owned by a partnership or other unincorporated firm, give its name and address as well as those of each individual owner. If the publication is published by a nonprofit organization, give its name and address.) |                                                                                      |                                           |                                                             |
| Full Name<br>American Psychiatric Assoc.                                                                                                                                                                                                                                                                                                                                                                                                                                                                                                                                | Complete Mailing Address<br>800 Maine Ave S.W., Suite 900, Washington, DC 20024-2812 |                                           |                                                             |
| 11. Known Bondholders, Mortgagees, and Other Security Holders Owning or Holding 1 Percent or More of Total Amount of Bonds, Mortgages, or Other Securities. If none, check box <input checked="" type="checkbox"/> None                                                                                                                                                                                                                                                                                                                                                 |                                                                                      |                                           |                                                             |
| Full Name                                                                                                                                                                                                                                                                                                                                                                                                                                                                                                                                                               | Complete Mailing Address                                                             |                                           |                                                             |
| 12. Tax Status (For completion by nonprofit organizations authorized to mail at nonprofit rates)<br>The purpose, function, and nonprofit status of this organization and the exempt status for federal income tax purposes:<br><input checked="" type="checkbox"/> Has Not Changed During Preceding 12 Months<br><input type="checkbox"/> Has Changed During Preceding 12 Months (Publisher must submit explanation of change with this statement)                                                                                                                      |                                                                                      |                                           |                                                             |

PS Form 3526, September 2007 (Page 1)

PRIVACY NOTICE: See our privacy policy on [www.usps.com](http://www.usps.com)

|                                                                                                                                                                                                                                                                                                                                                        |                                                          |                                                             |
|--------------------------------------------------------------------------------------------------------------------------------------------------------------------------------------------------------------------------------------------------------------------------------------------------------------------------------------------------------|----------------------------------------------------------|-------------------------------------------------------------|
| 13. Publication Title<br>AMERICAN PSYCHIATRIC ASSOCIATION/JOURNAL OF NEUROPSYCHIATRY AND CLINICAL NEUROSCIENCES (THE)                                                                                                                                                                                                                                  | 14. Issue Date for Circulation Data Below<br>07/01/2019  |                                                             |
| 15. Extend and Nature of Circulation                                                                                                                                                                                                                                                                                                                   | Average No. Copies Each Issue During Preceding 12 Months | No. Copies of Single Issue Published Nearest to Filing Date |
| a. Total Numbers of Copies (Net press run)                                                                                                                                                                                                                                                                                                             | 679                                                      | 659                                                         |
| (1) Mailed Outside County Paid Subscriptions Stated on PS Form 3541 (include paid distribution above nominal rate, advertiser's proof copies, and exchange copies)                                                                                                                                                                                     | 301                                                      | 399                                                         |
| b. Paid Circulation (By Mail and Outside the Mail)                                                                                                                                                                                                                                                                                                     | 0                                                        | 0                                                           |
| (2) Mailed In-County Paid Subscriptions Stated on PS Form 3541 (include paid distribution above nominal rate, advertiser's proof copies, and exchange copies)                                                                                                                                                                                          | 0                                                        | 0                                                           |
| (3) Paid Distribution Outside the Mails including Sales Through Dealers and Carriers, Street Vendors, Counter Sales, and Other Paid Distribution Outside USPS                                                                                                                                                                                          | 58                                                       | 63                                                          |
| (4) Paid Distribution by Other Classes of Mail Through the USPS (e.g. First-Class Mail)                                                                                                                                                                                                                                                                | 0                                                        | 0                                                           |
| c. Total Paid Distribution (Sum of 15b (1), (2), (3), (4))                                                                                                                                                                                                                                                                                             | 359                                                      | 462                                                         |
| d. Free or Nominal Rate Distribution (By Mail and Outside the Mail)                                                                                                                                                                                                                                                                                    | 0                                                        | 0                                                           |
| (1) Free or Nominal Rate Outside County Copies included on PS Form 3541                                                                                                                                                                                                                                                                                | 49                                                       | 45                                                          |
| (2) Free or Nominal Rate In-County Copies included on PS Form 3541                                                                                                                                                                                                                                                                                     | 0                                                        | 0                                                           |
| (3) Free or Nominal Rate Copies Mailed at Other Classes Through the USPS (e.g. First-Class Mail)                                                                                                                                                                                                                                                       | 0                                                        | 0                                                           |
| (4) Free or Nominal Rate Distribution Outside the Mail (Carriers or other means)                                                                                                                                                                                                                                                                       | 27                                                       | 27                                                          |
| e. Total Free or Nominal Rate Distribution (Sum of 15d (1), (2), (3), (4))                                                                                                                                                                                                                                                                             | 76                                                       | 72                                                          |
| f. Total Distribution (Sum of 15c and 15e)                                                                                                                                                                                                                                                                                                             | 435                                                      | 534                                                         |
| g. Copies not Distributed                                                                                                                                                                                                                                                                                                                              | 0                                                        | 0                                                           |
| h. Total (Sum of 15f and 15g)                                                                                                                                                                                                                                                                                                                          | 435                                                      | 534                                                         |
| i. Percent Paid ((15c / 15f) times 100)                                                                                                                                                                                                                                                                                                                | 82.53 %                                                  | 86.52 %                                                     |
| 16. If total circulation includes electronic copies, report that circulation on lines below.                                                                                                                                                                                                                                                           |                                                          |                                                             |
| a. Paid Electronic Copies                                                                                                                                                                                                                                                                                                                              | 0                                                        | 0                                                           |
| b. Total Paid Print Copies (Line 15c) + Paid Electronic Copies                                                                                                                                                                                                                                                                                         | 0                                                        | 0                                                           |
| c. Total Print Distribution (Line 15f) + Paid Electronic Copies                                                                                                                                                                                                                                                                                        | 0                                                        | 0                                                           |
| d. Percent Paid (Both Print and Electronic Copies)                                                                                                                                                                                                                                                                                                     | 0.00 %                                                   | 0.00 %                                                      |
| <input type="checkbox"/> I certify that 50% of all my distributed copies (Electronic and Print) are paid above a nominal price.                                                                                                                                                                                                                        |                                                          |                                                             |
| 17. Publication of Statement of Ownership<br><input checked="" type="checkbox"/> If the publication is a general publication, publication of this statement is required. Will be printed in the 11/01/2019 issue of this publication. <input type="checkbox"/> Publication not required.                                                               |                                                          |                                                             |
| 18. Signature and Title of Editor, Publisher, Business Manager, or Owner<br>Debra Eubanks                                                                                                                                                                                                                                                              | Title<br>Director, Publishing Business Operations        | Date<br>09/20/2019 13:38:40 PM                              |
| I certify that all information furnished on this form is true and complete. I understand that anyone who furnishes false or misleading information on this form or who omits material or information requested on the form may be subject to criminal sanctions (including fines and imprisonment) and/or civil sanctions (including civil penalties). |                                                          |                                                             |

PS Form 3526, September 2007 (Page 2)

PRIVACY NOTICE: See our privacy policy on [www.usps.com](http://www.usps.com)

## PSYCHIATRIC NEWS BRIEF

### Enable Psychiatric News Brief

With the American Psychiatric Association's new flash briefing, *Psychiatric News Brief*, you can now listen to synopses of curated articles from *Psychiatric News*. Simply enable this skill and you can listen anytime you choose throughout your day by just saying "Alexa, what's my flash briefing" or "Alexa, tell me what's new".

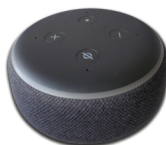

Flash briefing is a customizable Amazon skill that includes updates from your favorite content services. When you say, "Alexa, what's my flash briefing?" or "Alexa, what's the news," you'll hear updates from any organization that you have enabled.

Go to [psychnews.psychiatryonline.org/alexa](http://psychnews.psychiatryonline.org/alexa) to sign up now!

AMERICAN PSYCHIATRIC ASSOCIATION PUBLISHING  
www.appli.org  
Email: [appli@psych.org](mailto:appli@psych.org)  
Phone: 1-800-368-5777

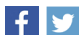

# American Neuropsychiatric Association

The American Neuropsychiatric Association (ANPA), established in 1988, is an organization of professionals in neuropsychiatry, behavioral neurology, neuropsychology and the clinical neurosciences. Our mission is to improve the lives of people with disorders at the interface of psychiatry and neurology.

Our diverse membership is comprised of professionals in all areas of neuroscience who share clinical and/or academic interests in neuropsychiatry. *The Journal of Neuropsychiatry and Clinical Neurosciences (JNCN)* is the official publication of the organization, and a subscription is a benefit of membership.

ANPA holds an annual scientific meeting that provides the opportunity for attendees to earn continuing education and maintenance of certification credits, as well as the opportunity for collaboration among educators, clinicians, researchers, students and trainees during research presentations, symposia, workshops, and continuing education courses. Members are encouraged to submit their work for presentation at our annual meetings. Travel awards are available for promising trainee clinicians and investigators. Annual meeting abstracts and proceedings are published in *The Journal of Neuropsychiatry and Clinical Neurosciences (JNCN)*, the official publication of the organization.

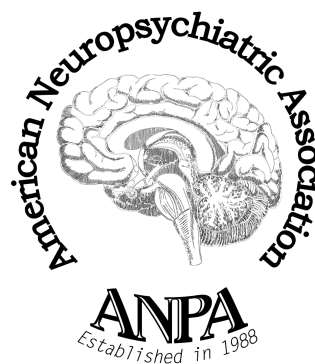

## Benefits of Membership ←

- Subscription to *The Journal of Neuropsychiatry and Clinical Neurosciences (JNCN)*
- Discounts on subscriptions to PsychiatryOnline.com including DSM Premium and DSM Premium Plus
- Opportunities for presenting at the annual meeting with accepted abstracts published in the *JNCN*
- Significantly reduced registration fees to the annual meeting
- Discounted membership and meeting registration fees for trainees and students
- Newsletters, news updates, information on job and training opportunities, research and meeting information on the ANPA web site: [www.anpaonline.org](http://www.anpaonline.org)
- Collaboration in clinical, educational and research activities with opportunities to interact with leaders in the field
- Complimentary video recordings of the annual meetings
- Access to educational slide sets assembled by the Education Committee
- Membership in Special Interest Groups (SIGs) designed to draw together ANPA members with similar clinical, research, and academic interests for the purposes of peer discussion, education, and potential collaboration

## Contact Information ←

Website: [www.anpaonline.org](http://www.anpaonline.org) • Email: [anpaoffice@gmail.com](mailto:anpaoffice@gmail.com)

## → Join ANPA Now!

## Don't miss ANPA's 31<sup>st</sup> Annual Meeting

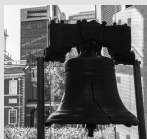

# Philadelphia

Pennsylvania, USA

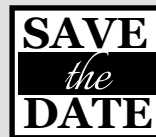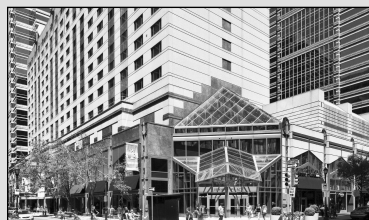

The Westin Philadelphia  
99 South 17<sup>th</sup> Street  
at Liberty Place

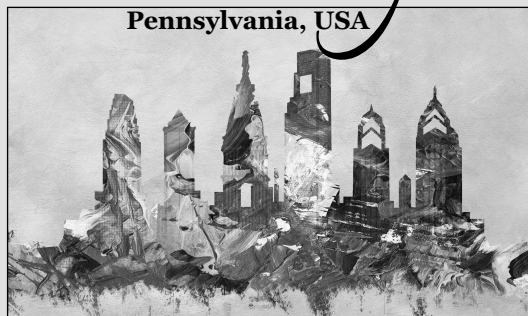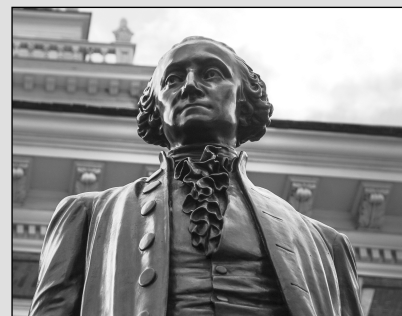

Join online at [www.anpaonline.org/join](http://www.anpaonline.org/join)

**MARCH 18-21, 2020**

*Ariella, an artist, musician, and real person living with schizophrenia*

SCHIZOPHRENIA  
DIAGNOSIS

EXPERIENCED  
SIDE EFFECTS

STARTED  
COLLEGE

STARTED  
MEDICATION

STOPPED  
MEDICATION

G  
R  
A  
D  
U  
A  
T  
I  
O  
N

# Schizophrenia shouldn't derail her life

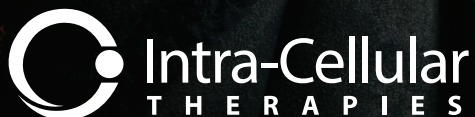

BUILT ON NOBEL PRIZE-WINNING SCIENCE

Visit [SZJourney.com](http://SZJourney.com) to learn more
